# Supplementary material for: Assessment of acidity and the zeolite porous structure on hydrocracking of HDPE
Source: Royal Society of Chemistry journal article supplement (doi:10.1039/d2se00497f), 2022-01-01
Supplement: d2se00497f1.pdf [file d2se00497f1.pdf]

## SUPPORTING INFORMATION

### Assessment of acidity and zeolite porous structure on hydrocracking of HDPE

Cátia S. Costa<sup>a\*</sup>, Hang Dao Thi<sup>b</sup>, Kevin M. Van Geem<sup>b</sup>, M. Rosário Ribeiro<sup>a\*</sup>, João M. Silva<sup>a,c</sup>

<sup>a</sup> Centro de Química Estrutural - Instituto Superior Técnico, Universidade de Lisboa, Portugal

<sup>b</sup> Ghent University, Laboratory for Chemical Technology, Technologiepark 125, 9052 Ghent, Belgium

<sup>c</sup> Chemical Engineering Department, Instituto Superior de Engenharia de Lisboa, Instituto Politécnico de Lisboa, Portugal

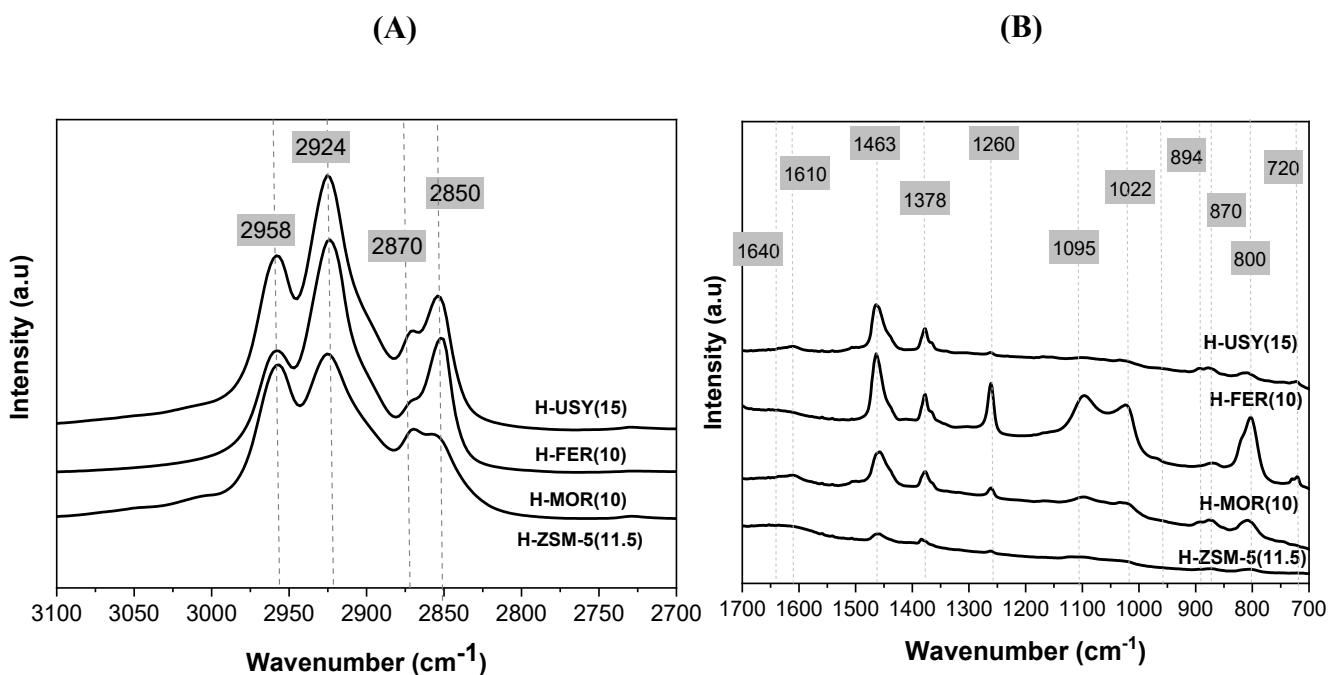

**Figure S.1-** FTIR analysis of liquid oil produced from catalytic cracking of HDPE under  $\text{H}_2$  pressure over H-ZSM-5, H-MOR, H-USY and H-FER ( $T=300^\circ\text{C}$ ,  $t=60\text{min}$ ,  $P_{\text{H}_2}=20\text{ bar}$ , HDPE/catalyst mass ratio= 8/2)

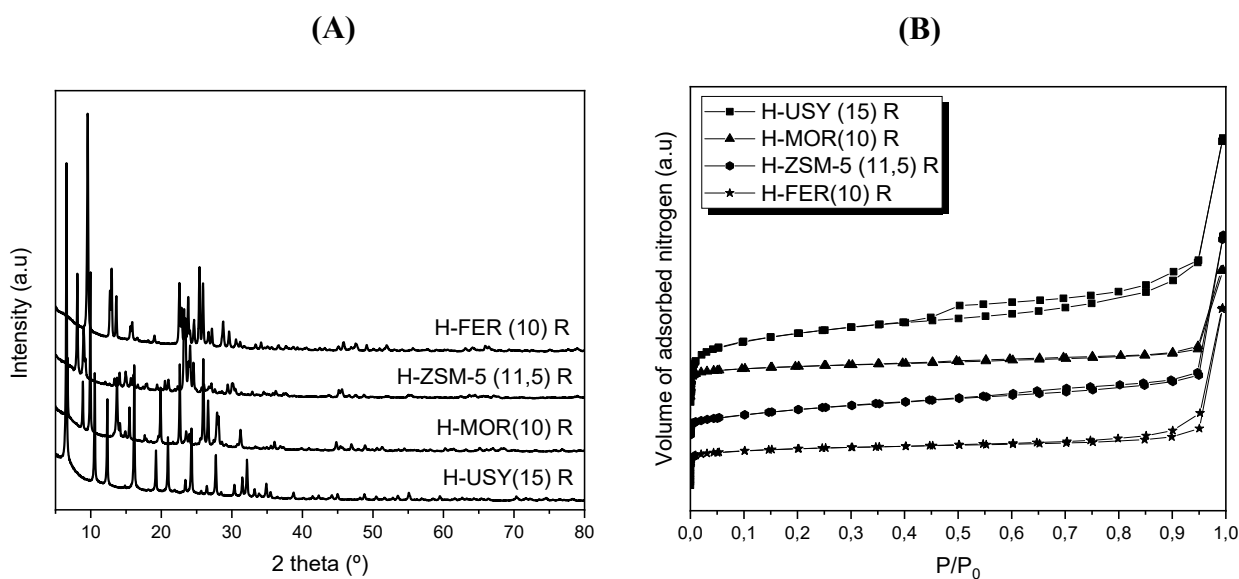

**Figure S.2-** PXRD diffractograms (A) and N<sub>2</sub> sorption isotherms (B) of H-ZSM-5, H-MOR, H-USY and H-FER after regeneration (R) procedure (T=800°C, t=60min, air atmosphere).

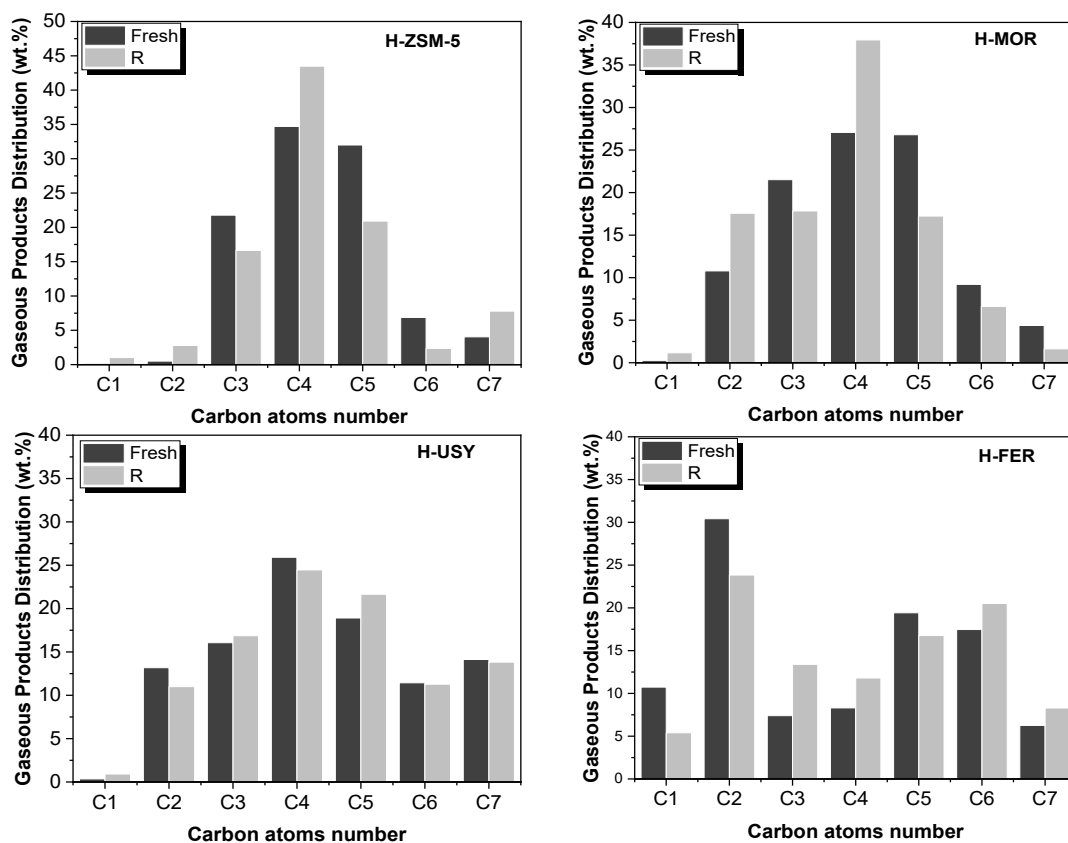

**Figure S.3-** Gaseous products distribution cracking of HDPE under H<sub>2</sub> pressure over regenerated H-ZSM-5, H-MOR, H-USY and H-FER (T=300°C, t=60min, P<sub>H<sub>2</sub></sub>=20 bar, HDPE/catalyst mass ratio= 8/2)

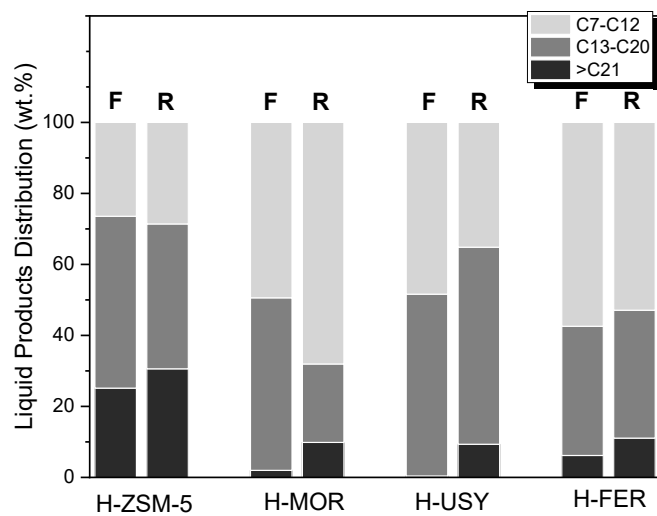

**Figure S.4-** Liquid products distribution cracking of HDPE under H<sub>2</sub> pressure over regenerated H-ZSM-5, H-MOR, H-USY and H-FER (T=300°C, t=60min, PH<sub>2</sub>=20 bar, HDPE/catalyst mass ratio= 8/2)
